# Supplementary material for: Evaluation of the rapid diagnostic test CareStart pLDH Malaria (Pf-pLDH/pan-pLDH) for the diagnosis of malaria in a reference setting
Source: Malar J. 2012 Jun 18;11:204. doi: 10.1186/1475-2875-11-204 (PMC3464813; doi:10.1186/1475-2875-11-204)
Supplement: Additional file 1 — Line intensity consensus for the CareStart pLDH for Pf-pLDH, retrospective evaluation. [file 1475-2875-11-204-S1.xlsx]

## Sheet: Sheet1
Additional file 1: Line intensity consensus for the Carestart pLDH for Pf-pLDH, retrospective evaluation
			Line intensity readings, number of samples
Microscopy corrected by PCR			Negative	Faint	Weak	Medium	Strong	Total
All P. falciparum samples			13	33	42	27	132	247
	Pure gametocytemia		2	4	3	2	2	13
	Asexual parasite density 1-100/µl		7	15	5			27
	Asexual parasite density 101-200/µl		1	4	6	3	1	15
	Asexual parasite density 201-1,000/µl		1	8	14	7	4	34
	Asexual parasite density >1,000/µl		2	2	14	15	125	158
	Asexual parasite density >100/µl		4	14	34	25	130	207
All other species and negative samples			241	6	3		1	251
	No parasites seen		96					96
	P.vivax		60	6	3		1	70
	P.ovale		69					69
	P.malariae		16					16
