# Supplementary material for: Evaluation of the rapid diagnostic test CareStart pLDH Malaria (Pf-pLDH/pan-pLDH) for the diagnosis of malaria in a reference setting
Source: Malar J. 2012 Jun 18;11:204. doi: 10.1186/1475-2875-11-204 (PMC3464813; doi:10.1186/1475-2875-11-204)
Supplement: Additional file 2 — Line intensity consensus for the CareStart pLDH for pan-pLDH, retrospective evaluation. [file 1475-2875-11-204-S2.xlsx]

## Sheet: Sheet1
Additional file 2 Line intensity consensus for the Carestart pLDH for pan-pLDH, retrospective evaluation
			Line intensity readings, number of samples
Microscopy corrected by PCR			Negative	Faint	Weak	Medium	Strong	Total
All P. falciparum samples			86	72	52	27	10	247
	Pure gametocytemia		11	2				13
	Asexual parasite density 1-100/µl		27					27
	Asexual parasite density 101-200/µl		11	4				15
	Asexual parasite density 201-1,000/µl		24	10				34
	Asexual parasite density >1,000/µl		13	56	52	27	10	158
	Asexual parasite density >100/µl		48	70	52	27	10	207
All other species and negative samples			163	18	30	16	23	250
	No parasites seen		96					96
	P.vivax		9	10	20	9	22	70
	P.ovale		47	7	8	6	1	69
	P.malariae		12	1	2	1		16
